# Supplementary material for: Achieving small non-radiative energy loss through synergically non-fullerene electron acceptor selection and side chain engineering in benzo[1,2-b:4,5-b′]difuran polymer-based organic solar cells
Source: Royal Society of Chemistry journal article supplement (doi:10.1039/d1ta04214a), 2021-01-01
Supplement: d1ta04214a1.pdf [file d1ta04214a1.pdf]

Supporting Information

**Achieving Small Non-Radiative Energy Loss Through Synergically Non-Fullerene  
Electron Acceptor Selection and Side Chain Engineering in Benzo[1,2-b:4,5-  
b']difuran Polymer-Based Organic Solar Cells**

*Zhi Zheng,<sup>a</sup> Mengyang Li,<sup>b</sup> Zhaotong Qin,<sup>c</sup> Enfang He,<sup>a</sup> Yuli Yin,<sup>a</sup> Fengyun Guo,<sup>a</sup>  
Shiyong Gao,<sup>a</sup> Xinchang Pang,<sup>e</sup> Liancheng Zhao,<sup>a</sup> Zheng Tang,<sup>\*b</sup> Xihu Lu,<sup>c</sup> and Yong  
Zhang<sup>\*,a,d</sup>*

<sup>a</sup>School of Materials Science and Engineering, Harbin Institute of Technology, Harbin  
150001, China

E-mail: yongzhang@hit.edu.cn

<sup>b</sup>Center for Advanced Low-Dimension Materials, State Key Laboratory for  
Modification of Chemical Fibers and Polymer Materials, College of Materials Science  
and Engineering, Donghua University, Shanghai 201620, China

E-mail: ztang@dhu.edu.cn

<sup>c</sup>Department of Physics, The Chinese University of Hong Kong, New Territories  
999077, Hong Kong

<sup>d</sup>School of Materials Science and Engineering, Zhengzhou University, Zhengzhou  
450001, China

## **Experimental Section**

*Device Fabrication:* The BDF based devices were fabricated with the structure of ITO/ZnO/active layer/MoO<sub>x</sub>/Ag in a N<sub>2</sub>-filled glovebox and characterized in the air without encapsulation. The ITO (150 nm)-coated glass substrates were cleaned with isopropyl alcohol, dishwashing liquid, deionized water, ethanol, acetone, and isopropanol for 30 min, respectively. After being dried, the ZnO precursor was spin-coated onto the cleaned ITO glass at 4000 rpm/min for 30s and annealed in the titanium plate under 250 °C for 30 mins. The resulting ZnO was 30 nm thick. The active layer was spin-coated in a N<sub>2</sub>-filled glovebox from a solution of polymer:*m*-ITIC with 1:1.5 weight ratio in chlorobenzene. The resulting active layer was 100 nm thick. Then, we tried different annealing temperature of 100-150 °C for 2min and different additives, finally, we found 130 °C for 2min without additives achieved the highest PCEs. For BDFs: Y6 based devices, we refer to the literature that has reported that Y6 is used as the receptor and use similar optimization conditions to obtain the best efficiency. The active layer was spin-coated in a N<sub>2</sub>-filled glovebox from a solution of BDFs:Y6 with 1: 1.2 weight ratio in chloroform and maintain a concentration of 14mg/ml with 0.5% 2-chloronaphthalene (CN) as solvent additives. Subsequently, the active layers were undergone thermal annealing treatment at 130 °C for 2 min. Finally, 1.5 nm MoO<sub>x</sub> and 100 nm Ag were sequentially evaporated on the active layer in the vacuum chamber under a pressure of ca.  $2.5 \times 10^{-4}$  Pa. The effective area of one cell is 4 mm<sup>2</sup>.

*Measurement:* All the measurements were carried out under ambient condition. The current-voltage (J-V) characteristics of the devices were measured on a Keithley 2400

Source Measure Unit. The power conversion efficiency (PCE) was measured under an illumination of AM 1.5G (100 mW/cm<sup>2</sup>) using a 7IS0503A (SOFN Instruments Co. Ltd.) solar simulator. The EQE was measured by 7-SCSpec (SOFN Instruments Co. Ltd.) which light intensity at each wavelength was calibrated with a standard single-crystal Si photovoltaic cell. The morphologies of the polymer/acceptor were investigated by AFM (Dimension Fastscan) in contacting under normal air conditions at room temperature with 2 $\mu$ m scanner.

Electroluminescence measurements were done using a source meter (Keithley 2400) to inject electric current, and the emitted photons were measured using a fluorescence spectrometer (KYMERA-3281-B2, Andor) with two sets of diffraction gratings, a Si EMCCD camera (DU970PBVF, Andor) for the wavelength range of 400~1000 nm, and an InGaAs camera (DU491A-1.7, Andor) for the wavelength range of 900~1600 nm.

Photoluminescence measurements were done using a laser excitation (460 nm), and the emission spectra were obtained using the same setup used for recording electroluminescence spectra. The transient photovoltage decay measurements were done using two white LED lamps, driven by a Keithley 2450 source meter for different bias illumination intensities and an arbitrary function generator (AFG3022C, Tektronix) for the transient illumination. The peaks of the transient voltage signals, recorded by an oscilloscope (MDO4104C, Tektronix), were kept to approximated 5% of the DC bias photovoltage signal, by adjusting the driving voltage of the LED controlled by the function generator for each bias illumination intensity, and the record

transient photovoltage decay signals were fitted using an exponential decay function for determining the decay time constants.

The GIWAXS measurements were carried out with a Xeuss 2.0 SAXS/WAXS laboratory beamline using a Cu K $\alpha$  X-ray source (8.05 eV, 1.54 Å) and a Pilatus 3r 300 K detector. The incident angle was 0.2°.

*Calculation of bandgaps of polymers and acceptors:* The optical bandgap ( $E_g^{\text{opt}}$ ) can be calculated by the intersection of the linear fitting curve of the absorption edge and the abscissa axis (or the tangent of absorption tail). The photovoltaic bandgap ( $E_g^{\text{PV}}$ ) is the bandgap determined from the derivatives of the EQE<sup>PV</sup> spectra. The edge bandgap ( $E_g^{\text{edge}}$ ) is given by the crossing point between the EQE<sup>PV</sup> spectra edge and the horizontal tangent of the EQE<sup>PV</sup> peak.

*Calculation of energy levels:* The electrochemical properties of P-FT and P-FP are investigated by cyclic voltammetry (CV) measurements. According to the equation  $E_{\text{HOMO}} = -e(V_{\text{ox}} + 4.80 - V_{\text{ferro}})$ . According to the reduction onsets and calibration of the ferrocene/ferrocenium (Fc/Fc+) redox couple, the lowest unoccupied molecular orbitals (LUMOs) of these BDF based polymers are estimated to be -3.48 and -3.61 eV, then the HOMO energy levels also can be calculated as -5.48 and -5.54 eV.

*Calculation of  $V_{oc}^{SQ}$ :*

$$qV_{oc}^{SQ} = \frac{kT}{q} \ln \left( \frac{q \int_{E_g}^{+\infty} \Phi_{AM1.5G}(E) \cdot dE}{q \int_{E_g}^{+\infty} \Phi_{BB}(E) \cdot dE} \right)$$

*Calculation of interaction parameter:* The estimation for  $\chi_{D,A}$  can be derived using the empirical equation, where K is a constant while  $\gamma_D$  and  $\gamma_A$  are the surface energies of the polymer and acceptor films, respectively.

$$\chi_{DA} = K(\sqrt{\gamma_D} - \sqrt{\gamma_A})^2$$

Surface energies could be resolved into nonpolar (dispersion) and polar components.

$$\gamma = \gamma^d + \gamma^p$$

Furthermore, the dispersive and polar surface tension can be calculated based on contact angles obtained by the water and glycerol, as shown below

$$(1 + \cos \theta)\gamma_L = \frac{4\gamma_s^d\gamma_L^d}{\gamma_s^d + \gamma_L^d} + \frac{4\gamma_s^p\gamma_L^p}{\gamma_s^p + \gamma_L^p}$$

where  $\theta$  is the contact angle of a specific solvent,  $\gamma_L$  represents the surface energy of the solvent,  $\gamma_s^d$  and  $\gamma_s^p$  refer to the dispersive and polar surface energy of the solid, respectively, and  $\gamma_L^d$  and  $\gamma_L^p$  represent dispersive and polar surface energy of the liquid solvent, respectively. Thus, the unknown  $\gamma_s^d$  and  $\gamma_s^p$  are obtained by determining contact angles of diiodomethane and water, respectively.

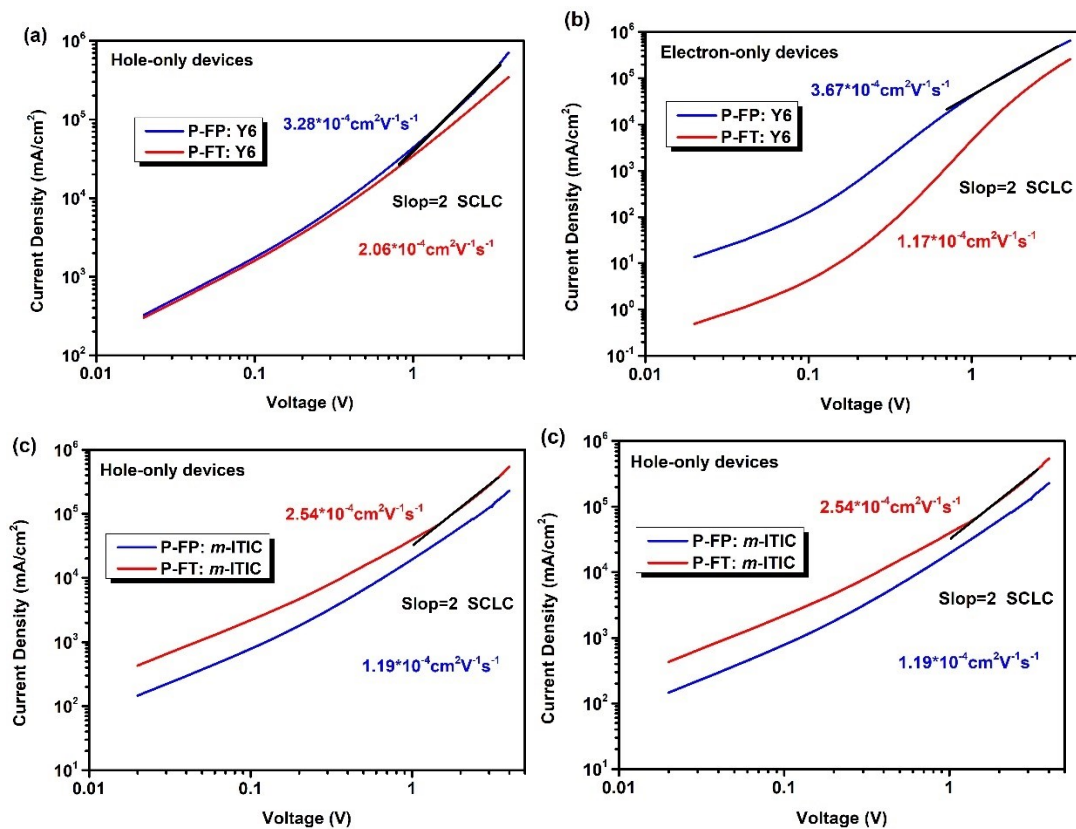

**Figure S1.** SCLC characteristics of the hole-only and electron-only devices.

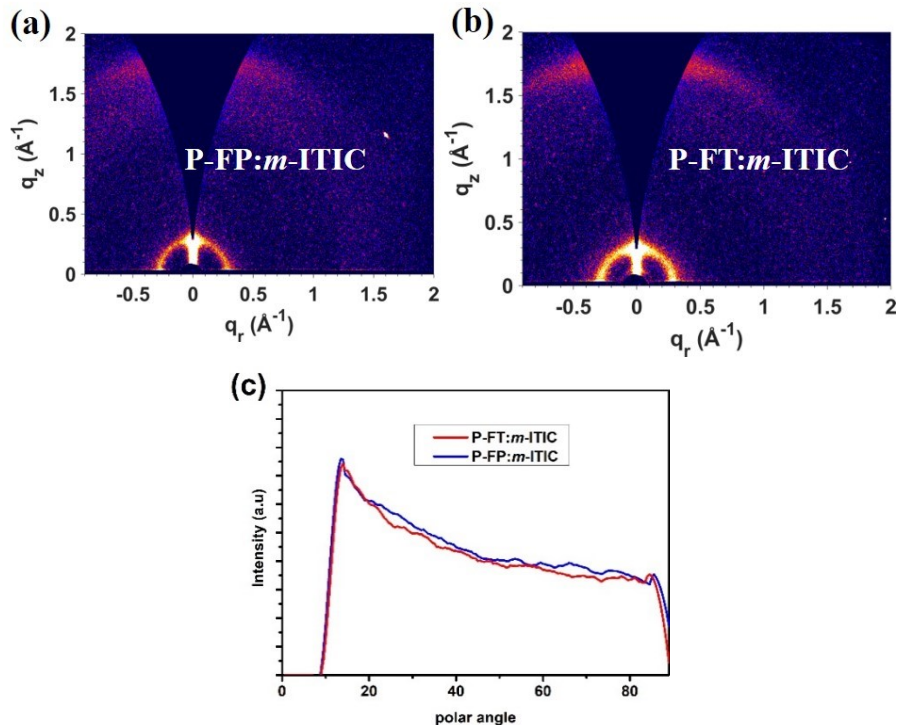

**Figure S2.** The 2D GIWAXS patterns of P-FT: *m*-ITIC and P-FP:*m*-ITIC (a, b), and corresponding linecuts of (010) diffraction peaks along polar angle(c).

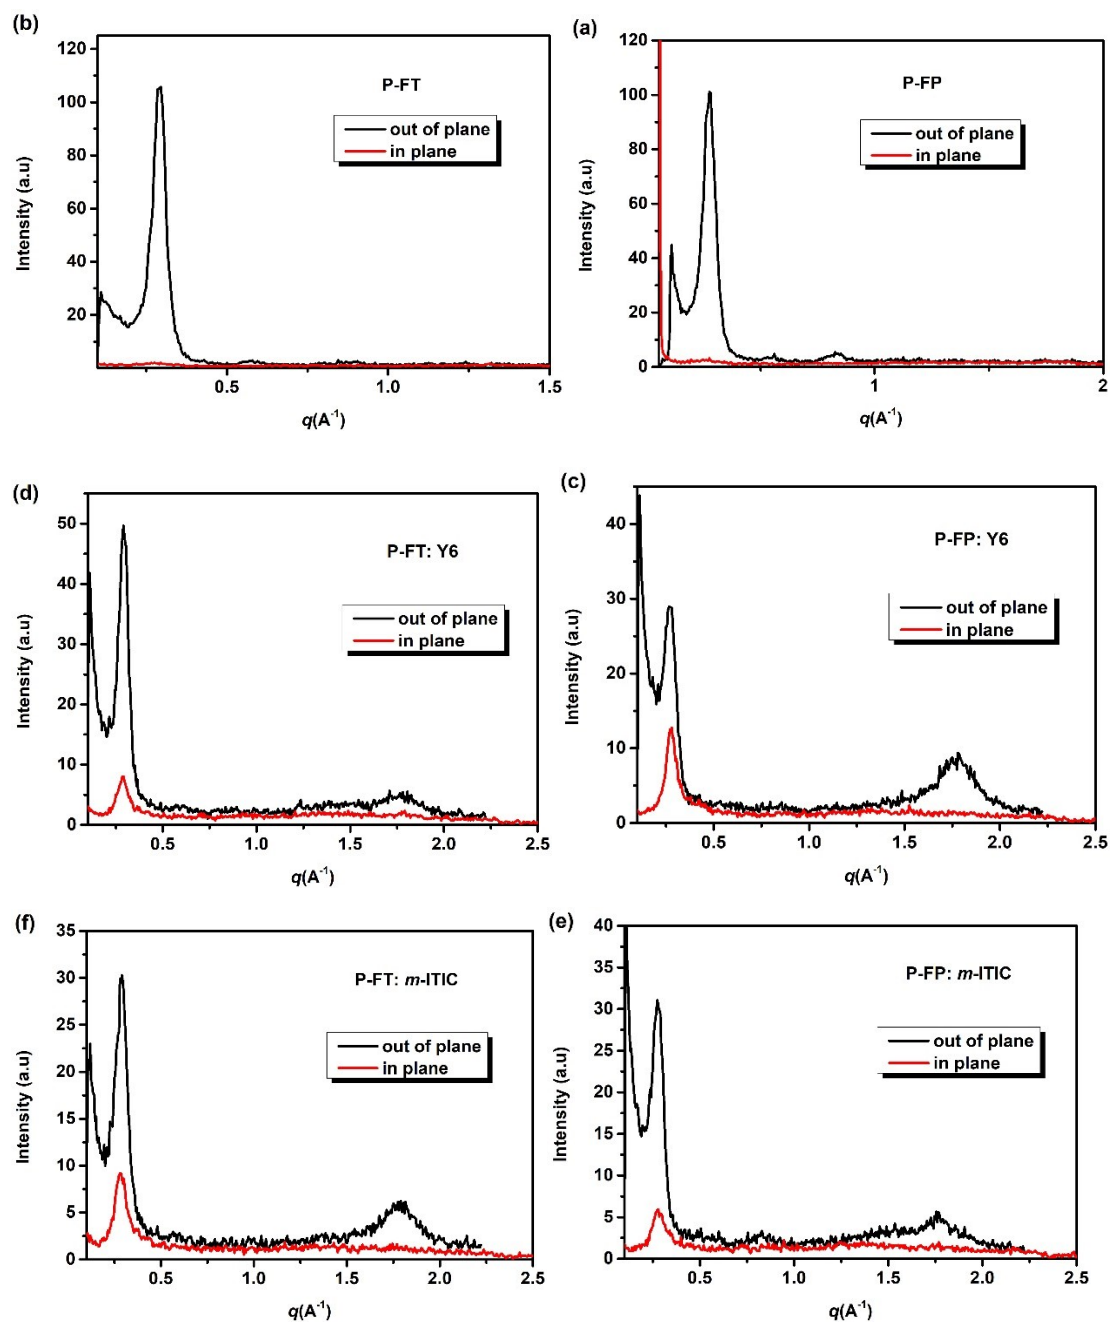

**Figure S3.** GIWAXS linecuts of the a) neat P-FT film, b) neat P-FP film, c) P-FT:Y6 blend film, d) P-FP:Y6 blend film, e) P-FT: *m*-ITIC and f) P-FP:*m*-ITIC blend film, along in-plane and out-of-plane directions, respectively.

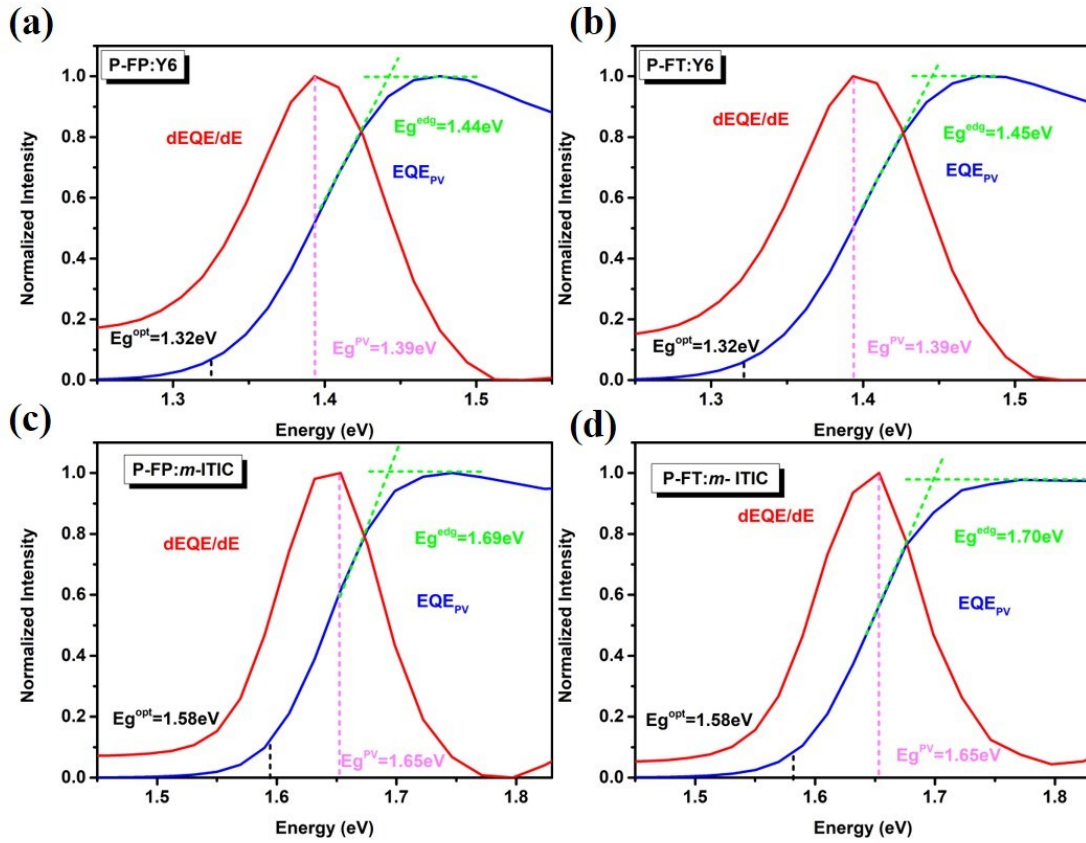

**Figure S4.**  $E_g$  determination for photoactive layers prepared under different condition using different methods. (a-c). P-FP, P-FT:Y6; d-f) P-FP, P-FT :*m*-ITIC. onset  $E_g$  is the optical gap determined from the absorption onset, while  $E_g^{PV}$  is the optical gap determined from the derivatives of the EQE spectra and edge  $E_g$  is given by the crossing point between the EQE spectra edge and horizontal tangent of EQE peak.

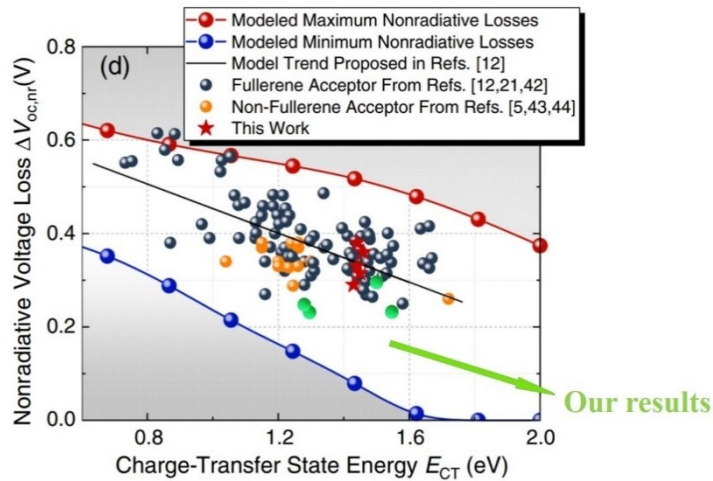



**Figure S5.** The results of our study in comparison with the predicted nonradiative voltage losses obtained using the proposed model by Nelson and coworkers. The figure is duplicated from the literature (*Phys. Rev. X.* **2018**, 8, 031055.) with our results marked by green circles.

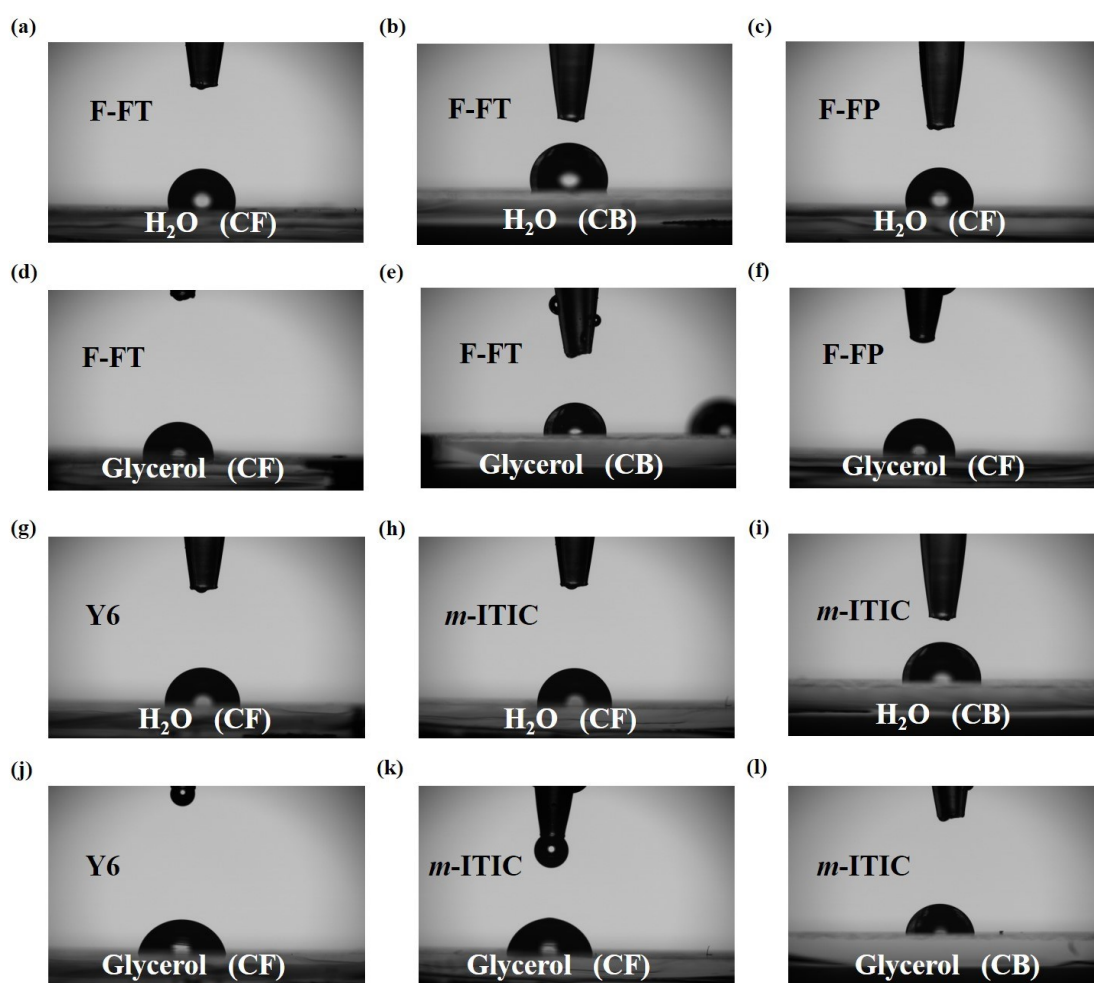

**Figure S6.** Water and glycerol contact angle images of (a,d) P-FT, (c,f) P-FP, (g,j) Y6 and (h,k) *m*-ITIC and (b,e) P-FT, (i,l) *m*-ITIC casting from CB, respectively.

**Table S1.** Summary of the  $E_g$  determination.

| Polymer | Acceptor       | $E_g^{onset}$ (eV) | $E_g^{PV}$ (eV) | $E_g^{edge}$ (eV) |
|---------|----------------|--------------------|-----------------|-------------------|
| P-FP    | Y6             | 1.32               | 1.39            | 1.44              |
|         | <i>m</i> -ITIC | 1.58               | 1.65            | 1.69              |
| P-FT    | Y6             | 1.32               | 1.39            | 1.45              |

|                |      |      |      |
|----------------|------|------|------|
| <i>m</i> -ITIC | 1.58 | 1.65 | 1.70 |
|----------------|------|------|------|

**Table S2.** Contact angles and surface energy parameters of the polymer and acceptor films.

| surface            | $\theta_{\text{water}}$ | $\theta_{\text{glycerol}}$ | $\gamma_s^d$ | $\gamma_s^p$ | $\gamma$ |
|--------------------|-------------------------|----------------------------|--------------|--------------|----------|
| P-FT(CF)           | 106.40                  | 106.02                     | 2.82         | 13.32        | 16.14    |
| P-FT(CB)           | 110.08                  | 96.00                      | 18.40        | 2.05         | 20.45    |
| P-FP               | 108.00                  | 97.01                      | 13.95        | 4.42         | 18.37    |
| Y6                 | 93.10                   | 79.40                      | 18.79        | 8.28         | 27.07    |
| <i>m</i> -ITIC(CF) | 99.60                   | 79.99                      | 27.38        | 3.22         | 30.6     |
| <i>m</i> -ITIC(CB) | 97.13                   | 82.65                      | 19.44        | 6.37         | 25.81    |

**Table S3.** The interaction parameter of blend films.

| Polymer | Acceptor       | $\chi_{DA}$ |
|---------|----------------|-------------|
| P-FP    | Y6             | 0.84        |
|         | <i>m</i> -ITIC | 1.55        |
| P-FT    | Y6             | 1.41        |
|         | <i>m</i> -ITIC | 0.31        |

**Table S4.** Summary for  $E_{\text{loss}}$ , PCE and  $\text{EQE}_{\text{max}}$  of BDT and other polymers based OSCs.

| Number | $E_{\text{loss}}$ (eV) | PCE(%) | $\text{EQE}_{\text{max}}$ (%) | Reference |
|--------|------------------------|--------|-------------------------------|-----------|
| 1      | 0.52                   | 10.6   | 68                            | 1         |
| 2      | 0.68                   | 11.2   | 75                            | 2         |
| 3      | 0.65                   | 12.1   | 78                            | 3         |
| 4      | 0.64                   | 11.3   | 75                            | 3         |
| 5      | 0.64                   | 11.4   | 75                            | 4         |
| 6      | 0.7                    | 10.4   | 75                            | 5         |
| 7      | 0.68                   | 10.4   | 74                            | 6         |
| 8      | 0.62                   | 12.1   | 74                            | 7         |
| 9      | 0.65                   | 11.2   | 72                            | 8         |
| 10     | 0.68                   | 12.1   | 77                            | 9         |
| 11     | 0.67                   | 11.8   | 79                            | 10        |
| 12     | 0.66                   | 11.6   | 79                            | 11        |
| 13     | 0.64                   | 12.1   | 77                            | 11        |

|    |      |       |    |    |
|----|------|-------|----|----|
| 14 | 0.62 | 10.2  | 72 | 11 |
| 15 | 0.61 | 10.7  | 72 | 12 |
| 16 | 0.62 | 11.1  | 78 | 12 |
| 17 | 0.67 | 10.1  | 66 | 12 |
| 18 | 0.71 | 10.1  | 74 | 13 |
| 19 | 0.63 | 11    | 77 | 14 |
| 20 | 0.59 | 11.2  | 79 | 15 |
| 21 | 0.62 | 10.1  | 70 | 16 |
| 22 | 0.65 | 10.8  | 76 | 16 |
| 23 | 0.68 | 11.5  | 77 | 16 |
| 24 | 0.65 | 11.9  | 79 | 17 |
| 25 | 0.66 | 10.8  | 78 | 17 |
| 26 | 0.63 | 11.3  | 81 | 18 |
| 27 | 0.63 | 12.2  | 74 | 19 |
| 28 | 0.58 | 11.9  | 81 | 20 |
| 29 | 0.57 | 10    | 73 | 21 |
| 30 | 0.58 | 10.1  | 74 | 22 |
| 31 | 0.55 | 10.3  | 70 | 22 |
| 32 | 0.66 | 13.1  | 83 | 23 |
| 33 | 0.68 | 10.1  | 72 | 24 |
| 34 | 0.54 | 10.8  | 78 | 25 |
| 35 | 0.54 | 11.7  | 73 | 26 |
| 36 | 0.57 | 10.5  | 62 | 27 |
| 37 | 0.63 | 13.7  | 75 | 27 |
| 38 | 0.74 | 10.74 | 79 | 28 |
| 39 | 0.8  | 10.41 | 72 | 28 |
| 40 | 0.74 | 11.2  | 79 | 28 |
| 41 | 0.63 | 10.9  | 80 | 29 |
| 42 | 0.52 | 10.2  | 66 | 29 |
| 43 | 0.75 | 13.2  | 79 | 30 |
| 44 | 0.64 | 14.4  | 83 | 30 |
| 45 | 0.6  | 14.2  | 81 | 31 |
| 46 | 0.45 | 10.2  | 69 | 32 |
| 47 | 0.53 | 10.46 | 67 | 33 |
| 48 | 0.58 | 12.16 | 81 | 34 |
| 49 | 0.56 | 11.7  | 79 | 35 |
| 50 | 0.47 | 12.8  | 80 | 35 |
| 51 | 0.53 | 10    | 76 | 36 |
| 52 | 0.47 | 11.6  | 71 | 37 |
| 53 | 0.67 | 10.1  | 78 | 38 |
| 54 | 0.67 | 10.08 | 77 | 39 |
| 55 | 0.63 | 11.8  | 72 | 40 |
| 56 | 0.87 | 10.3  | 78 | 41 |

|    |      |       |      |    |
|----|------|-------|------|----|
| 57 | 0.88 | 10.8  | 87   | 42 |
| 58 | 0.66 | 11.47 | 80   | 43 |
| 59 | 0.65 | 12.1  | 86   | 44 |
| 60 | 0.55 | 13.63 | 79   | 45 |
| 61 | 0.5  | 13.04 | 76   | 46 |
| 62 | 0.52 | 12.5  | 78   | 47 |
| 63 | 0.67 | 10.5  | 75.8 | 48 |
| 64 | 0.54 | 10.1  | 71   | 48 |
| 65 | 0.62 | 10.3  | 71   | 49 |
| 66 | 0.63 | 11.6  | 80   | 50 |
| 67 | 0.5  | 12.1  | 78   | 51 |
| 68 | 0.57 | 12.2  | 75.7 | 52 |
| 69 | 0.53 | 11.3  | 73   | 52 |
| 70 | 0.56 | 11.2  | 70   | 52 |
| 71 | 0.59 | 12.7  | 73   | 53 |
| 72 | 0.59 | 12.6  | 72.2 | 54 |
| 73 | 0.57 | 10.6  | 63.7 | 54 |
| 74 | 0.52 | 10.3  | 53.7 | 54 |
| 75 | 0.59 | 10.4  | 68   | 55 |
| 76 | 0.52 | 11.1  | 75   | 56 |
| 77 | 0.69 | 12    | 80   | 57 |
| 78 | 0.71 | 11.5  | 80   | 57 |
| 79 | 0.71 | 10.9  | 80   | 57 |
| 80 | 0.67 | 11    | 75   | 58 |
| 81 | 0.64 | 11.7  | 72   | 59 |
| 82 | 0.54 | 12.8  | 81.7 | 60 |
| 83 | 0.55 | 11.7  | 76   | 60 |
| 84 | 0.67 | 10.08 | 76   | 61 |
| 85 | 0.62 | 10.26 | 77   | 61 |
| 86 | 0.76 | 12.5  | 79   | 62 |
| 87 | 0.7  | 12.1  | 80   | 62 |
| 88 | 0.67 | 10.7  | 72.5 | 63 |
| 89 | 0.7  | 12.1  | 80   | 64 |
| 90 | 0.54 | 10.5  | 81   | 65 |
| 91 | 0.63 | 12.5  | 83.5 | 66 |
| 92 | 0.61 | 12.5  | 81   | 66 |
| 93 | 0.59 | 11.5  | 66   | 67 |
| 94 | 0.61 | 13.1  | 80   | 68 |
| 95 | 0.74 | 10.6  | 80   | 69 |
| 96 | 0.59 | 11.9  | 83   | 70 |
| 97 | 0.71 | 10.2  | 80   | 70 |
| 98 | 0.64 | 13    | 80   | 71 |
| 99 | 0.55 | 14.1  | 79   | 72 |

|     |       |       |      |     |
|-----|-------|-------|------|-----|
| 100 | 0.7   | 13.3  | 83.1 | 72  |
| 101 | 0.71  | 10.9  | 76   | 73  |
| 102 | 0.68  | 14.04 | 83.5 | 74  |
| 103 | 0.57  | 13.8  | 80   | 75  |
| 104 | 0.49  | 13.7  | 80   | 76  |
| 105 | 0.78  | 11.3  | 79   | 77  |
| 106 | 0.65  | 11.3  | 72   | 78  |
| 107 | 0.81  | 11.7  | 85   | 79  |
| 108 | 0.62  | 10.1  | 72.5 | 80  |
| 109 | 0.79  | 11.5  | 73   | 81  |
| 110 | 0.67  | 10.88 | 72   | 82  |
| 111 | 0.72  | 11.03 | 81   | 83  |
| 112 | 0.65  | 10.16 | 72   | 84  |
| 113 | 0.6   | 11.63 | 77   | 85  |
| 114 | 0.67  | 11.47 | 77   | 86  |
| 115 | 0.7   | 11.12 | 80   | 87  |
| 116 | 0.55  | 12.17 | 76   | 88  |
| 117 | 0.82  | 10.33 | 80   | 89  |
| 118 | 0.6   | 11    | 85   | 90  |
| 119 | 0.55  | 10.21 | 68   | 91  |
| 120 | 0.81  | 10.4  | 76   | 92  |
| 121 | 0.55  | 10.1  | 65   | 93  |
| 122 | 0.6   | 8.6   | 70   | 94  |
| 123 | 0.752 | 13.17 | 80   | 95  |
| 124 | 0.59  | 14.3  | 81   | 96  |
| 125 | 0.47  | 7.66  | 58   | 97  |
| 126 | 0.721 | 13.03 | 81   | 98  |
| 127 | 0.49  | 15.43 | 80   | 99  |
| 128 | 0.89  | 8.77  | 73   | 100 |
| 129 | 0.57  | 11.48 | 73   | 101 |
| 130 | 0.689 | 14.16 | 77   | 102 |
| 131 | 0.662 | 13.68 | 72   | 102 |
| 132 | 0.51  | 13.9  | 77   | 103 |
| 133 | 0.75  | 12.88 | 79   | 104 |
| 134 | 0.72  | 13.54 | 79   | 104 |
| 135 | 0.552 | 16.2  | 86   | 105 |
| 136 | 0.537 | 17.52 | 86   | 105 |
| 137 | 0.56  | 13.15 | 82   | 106 |
| 138 | 0.55  | 13.75 | 75   | 106 |
| 139 | 0.52  | 12.06 | 72   | 107 |
| 140 | 0.758 | 7.66  | 78   | 108 |
| 141 | 0.53  | 16.52 | 81.5 | 109 |
| 142 | 0.6   | 14.2  | 81.5 | 110 |

|     |       |       |       |     |
|-----|-------|-------|-------|-----|
| 143 | 0.542 | 17.53 | 82    | 111 |
| 144 | 0.49  | 10.05 | 65    | 112 |
| 145 | 0.789 | 11.26 | 80    | 113 |
| 146 | 0.715 | 12.1  | 80    | 113 |
| 147 | 0.55  | 10.2  | 72    | 114 |
| 148 | 0.62  | 13.4  | 82    | 115 |
| 149 | 0.76  | 11.47 | 81    | 116 |
| 150 | 0.526 | 13.6  | 79    | 117 |
| 151 | 0.575 | 12.86 | 72    | 117 |
| 152 | 0.52  | 10.12 | 65    | 118 |
| 153 | 0.67  | 10.4  | 79    | 119 |
| 154 | 0.63  | 13.1  | 78    | 120 |
| 155 | 0.64  | 11.1  | 77    | 120 |
| 156 | 0.57  | 13.42 | 71    | 121 |
| 157 | 0.57  | 13.4  | 74    | 121 |
| 158 | 0.564 | 16.5  | 82    | 122 |
| 159 | 0.559 | 15.5  | 82    | 122 |
| 160 | 0.78  | 10.2  | 76    | 123 |
| 161 | 0.67  | 10.48 | 76    | 124 |
| 162 | 0.7   | 10.4  | 77    | 125 |
| 164 | 0.58  | 10.97 | 78    | 126 |
| 165 | 0.6   | 11    | 83    | 127 |
| 166 | 0.82  | 11.1  | 82    | 128 |
| 167 | 0.49  | 11.1  | 80    | 129 |
| 168 | 0.81  | 10.16 | 82    | 130 |
| 169 | 0.63  | 10.48 | 75    | 131 |
| 170 | 0.83  | 10.5  | 78    | 132 |
| 171 | 0.78  | 10.1  | 82    | 133 |
| 172 | 0.7   | 10.05 | 71    | 134 |
| 173 | 0.81  | 10.72 | 80    | 135 |
| 174 | 0.55  | 16.5  | 84    | 136 |
| 175 | 0.549 | 16.21 | 81    | 137 |
| 176 | 0.56  | 15.7  | 86    | 138 |
| 177 | 0.53  | 16.4  | 81.5  | 139 |
| 178 | 0.55  | 16.67 | 82    | 140 |
| 179 | 0.67  | 14.7  | 86    | 141 |
| 180 | 0.55  | 13.44 | 78    | 142 |
| 181 | 0.42  | 15.37 | 78    | 143 |
| 182 | 0.56  | 13.1  | 79    | 144 |
| 183 | 0.63  | 10.28 | 74    | 145 |
| 184 | 0.713 | 14    | 82    | 146 |
| 185 | 0.721 | 12.72 | 81    | 146 |
| 186 | 0.57  | 12.93 | 83.01 | 147 |

|     |       |       |      |     |
|-----|-------|-------|------|-----|
| 187 | 0.907 | 11.13 | 76   | 148 |
| 188 | 0.822 | 10.57 | 74   | 148 |
| 189 | 0.815 | 10.23 | 74   | 148 |
| 190 | 0.69  | 12.42 | 81.6 | 149 |

## References

- 1 J. Zhang, Y. Li, J. Huang, H. Hu, G. Zhang, T. Ma, P. C. Y. Chow, H. Ade, D. Pan and H. Yan, *J. Am. Chem. Soc.*, 2017, **139**, 16092-16095.
- 2 W. Zhao, D. Qian, S. Zhang, S. Li, O. Inganäs, F. Gao and J. Hou, *Adv. Mater.*, 2016, **28**, 4734-4739.
- 3 S. Li, L. Ye, W. Zhao, S. Zhang, S. Mukherjee, H. Ade and J. Hou, *Adv. Mater.*, 2016, **28**, 9423-9429.
- 4 H. Bin, L. Gao, Z. G. Zhang, Y. Yang, Y. Zhang, C. Zhang, S. Chen, L. Xue, C. Yang, M. Xiao and Y. Li, *Nat. Commun.*, 2016, **7**, 13651.
- 5 N. Qiu, H. Zhang, X. Wan, C. Li, X. Ke, H. Feng, B. Kan, H. Zhang, Q. Zhang, Y. Lu and Y. Chen, *Adv. Mater.*, 2017, **29**, 1604964.
- 6 B. Kan, H. Feng, X. Wan, F. Liu, X. Ke, Y. Wang, Y. Wang, H. Zhang, C. Li, J. Hou and Y. Chen, *J. Am. Chem. Soc.*, 2017, **139**, 4929-4934.
- 7 B. Kan, J. Zhang, F. Liu, X. Wan, C. Li, X. Ke, Y. Wang, H. Feng, Y. Zhang, G. Long, R. H. Friend, A. A. Bakulin and Y. Chen, *Adv. Mater.*, 2018, **30**, 1704904.
- 8 H. R. Feng, N. L. Qiu, X. Wang, Y. C. Wang, B. Kan, X. J. Wan, M. T. Zhang, A. D. Xia, C. X. Li, F. Liu, H. T. Zhang and Y. S. Chen, *Chem. Mater.*, 2017, **29**, 7908-7917.
- 9 F. Zhao, S. Dai, Y. Wu, Q. Zhang, J. Wang, L. Jiang, Q. Ling, Z. Wei, W. Ma, W. You, C. Wang and X. Zhan, *Adv. Mater.*, 2017, **29**, 1700144.
- 10 Y. Yang, Z. G. Zhang, H. Bin, S. Chen, L. Gao, L. Xue, C. Yang and Y. Li, *J. Am. Chem. Soc.*, 2016, **138**, 15011-15018.
- 11 H. J. Bin, Y. K. Yang, Z. X. Peng, L. Ye, J. Yao, L. Zhong, C. K. Sun, L. Gao, H. Huang, X. J. Li, B. B. Qiu, L. W. Xue, Z. G. Zhang, H. Ade and Y. F. Li, *Adv. Energy Mater.*, 2018, **8**, 1702324.
- 12 B. B. Qiu, L. W. Xue, Y. K. Yang, H. J. Bin, Y. D. Zhang, C. F. Zhang, M. Xiao, K. Park, W. Morrison, Z. G. Zhang and Y. F. Li, *Chem. Mater.*, 2017, **29**, 7543-7553.
- 13 S. Feng, C. Zhang, Y. Liu, Z. Bi, Z. Zhang, X. Xu, W. Ma and Z. Bo, *Adv. Mater.*, 2017, **29**, 1703527.
- 14 J. Wang, W. Wang, X. Wang, Y. Wu, Q. Zhang, C. Yan, W. Ma, W. You and X. Zhan, *Adv. Mater.*, 2017, **29**, 1702125.
- 15 B. Jia, S. Dai, Z. Ke, C. Yan, W. Ma and X. Zhan, *Chem. Mater.*, 2017, **30**, 239-245.
- 16 J. C. Jia, G. H. Liu, T. Jia, Z. F. Wang, K. W. Lin, Y. Li, F. Huang and Y. Cao, *Org. Electron.*, 2019, **68**, 151-158.
- 17 S. S. Li, L. Ye, W. C. Zhao, S. Q. Zhang, H. Ade and J. H. Hou, *Adv. Energy Mater.*, 2017, **7**, 1700183.
- 18 Z. Zheng, O. M. Awartani, B. Gautam, D. Liu, Y. Qin, W. Li, A. Bataller, K.

- Gundogdu, H. Ade and J. Hou, *Adv. Mater.*, 2017, **29**, 1604241.
- 19 S. Li, L. Ye, W. Zhao, X. Liu, J. Zhu, H. Ade and J. Hou, *Adv. Mater.*, 2017, **29**, 1704051.
- 20 D. L. Liu, B. Yang, B. M. Jang, B. W. Xu, S. Q. Zhang, C. He, H. Y. Woo and J. H. Hou, *Energy Environ. Sci.*, 2017, **10**, 546-551.
- 21 H. Yao, Y. Cui, R. Yu, B. Gao, H. Zhang and J. Hou, *Angew. Chem. Int. Ed.*, 2017, **56**, 3045-3049.
- 22 Y. Cui, C. Yang, H. Yao, J. Zhu, Y. Wang, G. Jia, F. Gao and J. Hou, *Adv. Mater.*, 2017, **29**, 1703080.
- 23 W. Zhao, S. Li, H. Yao, S. Zhang, Y. Zhang, B. Yang and J. Hou, *J. Am. Chem. Soc.*, 2017, **139**, 7148-7151.
- 24 F. Liu, Z. Zhou, C. Zhang, T. Vergote, H. Fan, F. Liu and X. Zhu, *J. Am. Chem. Soc.*, 2016, **138**, 15523-15526.
- 25 Q. P. Fan, Z. Xu, X. Guo, X. Y. Meng, W. B. Li, W. Y. Su, X. M. Ou, W. Ma, M. J. Zhang and Y. F. Li, *Nano Energy*, 2017, **40**, 20-26.
- 26 X. L. Shi, J. D. Chen, K. Gao, L. J. Zuo, Z. Y. Yao, F. Liu, J. X. Tang and A. K. Y. Jen, *Adv. Energy Mater.*, 2018, **8**, 1702831.
- 27 W. Li, L. Ye, S. Li, H. Yao, H. Ade and J. Hou, *Adv. Mater.*, 2018, **30**, 1707170.
- 28 W. Gao, M. Zhang, T. Liu, R. Ming, Q. An, K. Wu, D. Xie, Z. Luo, C. Zhong, F. Liu, F. Zhang, H. Yan and C. Yang, *Adv. Mater.*, 2018, **30**, 1800052.
- 29 S. Dai, T. Li, W. Wang, Y. Xiao, T. K. Lau, Z. Li, K. Liu, X. Lu and X. Zhan, *Adv. Mater.*, 2018, **30**, 1706571.
- 30 S. Zhang, Y. Qin, J. Zhu and J. Hou, *Adv. Mater.*, 2018, **30**, 1800868.
- 31 S. Li, L. Ye, W. Zhao, H. Yan, B. Yang, D. Liu, W. Li, H. Ade and J. Hou, *J. Am. Chem. Soc.*, 2018, **140**, 7159-7167.
- 32 Z. Yao, X. Liao, K. Gao, F. Lin, X. Xu, X. Shi, L. Zuo, F. Liu, Y. Chen and A. K. Jen, *J. Am. Chem. Soc.*, 2018, **140**, 2054-2057.
- 33 Y. X. Li, L. Zhong, B. Gautam, H. J. Bin, J. D. Lin, F. P. Wu, Z. J. Zhang, Z. Q. Jiang, Z. G. Zhang, K. Gundogdu, Y. F. Li and L. S. Liao, *Energy Environ. Sci.*, 2017, **10**, 1610-1620.
- 34 Z. Xiao, X. Jia, D. Li, S. Wang, X. Geng, F. Liu, J. Chen, S. Yang, T. P. Russell and L. Ding, *Sci. Bull.*, 2017, **62**, 1494-1496.
- 35 X. Xu, T. Yu, Z. Bi, W. Ma, Y. Li and Q. Peng, *Adv. Mater.*, 2018, **30**, 1703973.
- 36 D. Baran, T. Kirchartz, S. Wheeler, S. Dimitrov, M. Abdelsamie, J. Gorman, R. S. Ashraf, S. Holliday, A. Wadsworth, N. Gasparini, P. Kaienburg, H. Yan, A. Amassian, C. J. Brabec, J. R. Durrant and I. McCulloch, *Energ. Environ. Sci.*, 2016, **9**, 3783-3793.
- 37 S. Chen, Y. Liu, L. Zhang, P. C. Y. Chow, Z. Wang, G. Zhang, W. Ma and H. Yan, *J. Am. Chem. Soc.*, 2017, **139**, 6298-6301.
- 38 G. Zhang, G. Yang, H. Yan, J. H. Kim, H. Ade, W. Wu, X. Xu, Y. Duan and Q. Peng, *Adv. Mater.*, 2017, **29**, 1606054.
- 39 B. Kan, M. Li, Q. Zhang, F. Liu, X. Wan, Y. Wang, W. Ni, G. Long, X. Yang, H. Feng, Y. Zuo, M. Zhang, F. Huang, Y. Cao, T. P. Russell and Y. Chen, *J. Am. Chem. Soc.*, 2015, **137**, 3886-3893.



- 40 D. J. Xie, T. Liu, W. Gao, C. Zhong, L. J. Huo, Z. H. Luo, K. L. Wu, W. T. Xiong, F. Liu, Y. M. Sun and C. L. Yang, *Sol. RRL*, 2017, **1**, 1700044.
- 41 T. Liu, X. Pan, X. Meng, Y. Liu, D. Wei, W. Ma, L. Huo, X. Sun, T. H. Lee, M. Huang, H. Choi, J. Y. Kim, W. C. Choy and Y. Sun, *Adv. Mater.*, 2017, **29**, 1604251.
- 42 Y. Liu, J. Zhao, Z. Li, C. Mu, W. Ma, H. Hu, K. Jiang, H. Lin, H. Ade and H. Yan, *Nat. Commun.*, 2014, **5**, 5293.
- 43 T. Yu, X. Xu, G. Zhang, J. Wan, Y. Li and Q. Peng, *Adv. Funct. Mater.*, 2017, **27**, 1701491.
- 44 X. Li, X. Liu, W. Zhang, H.-Q. Wang and J. Fang, *Chem. Mater.*, 2017, **29**, 4176-4180.
- 45 Z. C. Zhou, S. J. Xu, J. N. Song, Y. Z. Jin, Q. H. Yue, Y. H. Qian, F. Liu, F. L. Zhang and X. Z. Zhu, *Nat. Energy*, 2018, **3**, 952-959.
- 46 C. Zhang, P. Jiang, X. Zhou, S. Feng, Z. Bi, X. Xu, C. Li, Z. Tang, W. Ma and Z. Bo, *ACS Appl. Mater. Interfaces*, 2020, **12**, 40590-40598.
- 47 C. Li, Y. P. Xie, B. B. Fan, G. C. Han, Y. P. Yi and Y. M. Sun, *J. Mater. Chem. C*, 2018, **6**, 4873-4877.
- 48 L. Zuo, X. Shi, S. B. Jo, Y. Liu, F. Lin and A. K. Jen, *Adv. Mater.*, 2018, **30**, 1706816.
- 49 Z. H. Zhang, J. S. Yu, X. X. Yin, Z. H. Hu, Y. F. Jiang, J. Sun, J. Zhou, F. J. Zhang, T. P. Russell, F. Liu and W. H. Tang, *Adv. Funct. Mater.*, 2018, **28**, 1705095.
- 50 J. Lee, S. J. Ko, M. Seifrid, H. Lee, C. McDowell, B. R. Luginbuhl, A. Karki, K. Cho, T. Q. Nguyen and G. C. Bazan, *Adv. Energy Mater.*, 2018, **8**, 1801209.
- 51 Y. Z. Chen, T. Liu, H. W. Hu, T. X. Ma, J. Y. L. Lai, J. Q. Zhang, H. Ade and H. Yan, *Adv. Energy Mater.*, 2018, **8**, 1801203.
- 52 Y. H. Liu, M. Li, X. B. Zhou, Q. Q. Jia, S. Y. Feng, P. C. Jiang, X. J. Xu, W. Ma, H. B. Li and Z. S. Bo, *ACS Energy Lett.*, 2018, **3**, 1832-1839.
- 53 D. Liu, B. Kan, X. Ke, N. Zheng, Z. Xie, D. Lu and Y. Liu, *Adv. Energy Mater.*, 2018, **8**, 1801618.
- 54 X. J. Li, H. Huang, Z. X. Peng, C. K. Sun, D. C. Yang, J. D. Zhou, A. Liebman-Pelaez, C. H. Zhu, Z. G. Zhang, Z. J. Zhang, Z. Q. Xie, H. Ade and Y. F. Li, *J. Mater. Chem. A*, 2018, **6**, 15933-15941.
- 55 X. Shi, X. Liao, K. Gao, L. Zuo, J. Chen, J. Zhao, F. Liu, Y. Chen and A. K. Y. Jen, *Adv. Funct. Mater.*, 2018, **28**, 1802324.
- 56 Y. Wang, Y. Zhang, N. Qiu, H. Feng, H. Gao, B. Kan, Y. Ma, C. Li, X. Wan and Y. Chen, *Adv. Energy Mater.*, 2018, **8**.
- 57 X. Ke, B. Kan, X. J. Wan, Y. C. Wang, Y. M. Zhang, C. X. Li and Y. S. Chen, *Dyes Pigm.*, 2018, **155**, 241-248.
- 58 S. X. Dai, Y. Q. Xiao, P. R. Xue, J. J. Rech, K. Liu, Z. Y. Li, X. H. Lu, W. You and X. W. Zhan, *Chem. Mater.*, 2018, **30**, 5390-5396.
- 59 T. Li, S. Dai, Z. Ke, L. Yang, J. Wang, C. Yan, W. Ma and X. Zhan, *Adv. Mater.*, 2018, **30**, 1705969.
- 60 B. Kan, Y. Q. Q. Yi, X. J. Wan, H. R. Feng, X. Ke, Y. B. Wang, C. X. Li and Y. S. Chen, *Adv. Energy Mater.*, 2018, **8**, 1800424.

- 61 Y. Zhang, B. Kan, Y. Sun, Y. Wang, R. Xia, X. Ke, Y. Q. Yi, C. Li, H. L. Yip, X. Wan, Y. Cao and Y. Chen, *Adv. Mater.*, 2018, **30**, 1707508.
- 62 Y. Lin, F. Zhao, S. K. K. Prasad, J. D. Chen, W. Cai, Q. Zhang, K. Chen, Y. Wu, W. Ma, F. Gao, J. X. Tang, C. Wang, W. You, J. M. Hodgkiss and X. Zhan, *Adv. Mater.*, 2018, **30**, 1706363.
- 63 Z. Li, S. Dai, J. Xin, L. Zhang, Y. Wu, J. Rech, F. Zhao, T. Li, K. Liu, Q. Liu, W. Ma, W. You, C. Wang and X. Zhan, *Mater. Chem. Front.*, 2018, **2**, 537-543.
- 64 J. Zhu, Z. Ke, Q. Zhang, J. Wang, S. Dai, Y. Wu, Y. Xu, Y. Lin, W. Ma, W. You and X. Zhan, *Adv. Mater.*, 2018, **30**, 1704713.
- 65 X. J. Li, H. Huang, H. J. Bin, Z. X. Peng, C. H. Zhu, L. W. Xue, Z. G. Zhang, Z. J. Zhang, H. Ade and Y. F. Li, *Chem. Mater.*, 2017, **29**, 10130-10138.
- 66 X. J. Li, J. Yao, I. Angunawela, C. K. Sun, L. W. Xue, A. Liebman-Pelaez, C. H. Zhu, C. H. Yang, Z. G. Zhang, H. Ade and Y. F. Li, *Adv. Energy Mater.*, 2018, **8**, 1800815.
- 67 S. X. Li, L. L. Zhan, W. C. Zhao, S. H. Zhang, B. Ali, Z. S. Fu, T. K. Lau, X. H. Lu, M. M. Shi, C. Z. Li, J. H. Hou and H. Z. Chen, *J. Mater. Chem. A*, 2018, **6**, 12132-12141.
- 68 J. Sun, X. Ma, Z. Zhang, J. Yu, J. Zhou, X. Yin, L. Yang, R. Geng, R. Zhu, F. Zhang and W. Tang, *Adv. Mater.*, 2018, **30**, e1707150.
- 69 W. Gao, Q. S. An, R. J. Ming, D. J. Xie, K. L. Wu, Z. H. Luo, Y. Zou, F. J. Zhang and C. L. Yang, *Adv. Funct. Mater.*, 2017, **27**, 1702194.
- 70 Q. Fan, Y. Wang, M. Zhang, B. Wu, X. Guo, Y. Jiang, W. Li, B. Guo, C. Ye, W. Su, J. Fang, X. Ou, F. Liu, Z. Wei, T. C. Sum, T. P. Russell and Y. Li, *Adv. Mater.*, 2018, **30**, 1704546.
- 71 J. Wang, J. Zhang, Y. Xiao, T. Xiao, R. Zhu, C. Yan, Y. Fu, G. Lu, X. Lu, S. R. Marder and X. Zhan, *J. Am. Chem. Soc.*, 2018, **140**, 9140-9147.
- 72 B. Kan, H. Feng, H. Yao, M. Chang, X. Wan, C. Li, J. Hou and Y. Chen, *Sci. China Chem.*, 2018, **61**, 1307-1313.
- 73 Y. Yin, Z. Zheng, D. Chen, M. Liu, J. Zhang, F. Guo, S. Gao, L. Zhao and Y. Zhang, *J. Mater. Chem. A*, 2019, **7**, 27493-27502.
- 74 Y. Li, N. Zheng, L. Yu, S. Wen, C. Gao, M. Sun and R. Yang, *Adv. Mater.*, 2019, **31**, 1807832.
- 75 W. Li, M. X. Chen, J. L. Cai, E. L. K. Spooner, H. J. Zhang, R. S. Gurney, D. Liu, Z. Xiao, D. G. Lidzey, L. M. Ding and T. Wang, *Joule*, 2019, **3**, 819-833.
- 76 S. S. Wan, X. P. Xu, J. L. Wang, G. Z. Yuan, Z. Jiang, G. Y. Ge, H. R. Bai, Z. Li and Q. Peng, *J. Mater. Chem. A*, 2019, **7**, 11802-11813.
- 77 D. Deng, Y. Zhang, J. Zhang, Z. Wang, L. Zhu, J. Fang, B. Xia, Z. Wang, K. Lu, W. Ma and Z. Wei, *Nat. Commun.*, 2016, **7**, 13740.
- 78 Y. C. Jin, Z. M. Chen, M. J. Xiao, J. J. Peng, B. B. Fan, L. Ying, G. C. Zhang, X. F. Jiang, Q. W. Yin, Z. Q. Liang, F. Huang and Y. Cao, *Adv. Energy Mater.*, 2017, **7**, 1700944.
- 79 J. Zhao, Y. Li, G. Yang, K. Jiang, H. Lin, H. Ade, W. Ma and H. Yan, *Nat. Energy*, 2016, **1**, 15027.
- 80 B. Fan, L. Ying, P. Zhu, F. Pan, F. Liu, J. Chen, F. Huang and Y. Cao, *Adv. Mater.*,

- 2017, **29**, 1703906.
- 81 B. Guo, W. Li, X. Guo, X. Meng, W. Ma, M. Zhang and Y. Li, *Adv. Mater.*, 2017, **29**, 1702291.
  - 82 Z. Li, K. Jiang, G. Yang, J. Y. Lai, T. Ma, J. Zhao, W. Ma and H. Yan, *Nat. Commun.*, 2016, **7**, 13094.
  - 83 Y. Lin, F. Zhao, Y. Wu, K. Chen, Y. Xia, G. Li, S. K. Prasad, J. Zhu, L. Huo, H. Bin, Z. G. Zhang, X. Guo, M. Zhang, Y. Sun, F. Gao, Z. Wei, W. Ma, C. Wang, J. Hodgkiss, Z. Bo, O. Inganas, Y. Li and X. Zhan, *Adv. Mater.*, 2017, **29**, 1604155.
  - 84 Y. Qin, M. A. Uddin, Y. Chen, B. Jang, K. Zhao, Z. Zheng, R. Yu, T. J. Shin, H. Y. Woo and J. Hou, *Adv. Mater.*, 2016, **28**, 9416-9422.
  - 85 L. Xue, Y. Yang, J. Xu, C. Zhang, H. Bin, Z. G. Zhang, B. Qiu, X. Li, C. Sun, L. Gao, J. Yao, X. Chen, Y. Yang, M. Xiao and Y. Li, *Adv. Mater.*, 2017, **29**, 1703344.
  - 86 H. Yao, L. Ye, J. Hou, B. Jang, G. Han, Y. Cui, G. M. Su, C. Wang, B. Gao, R. Yu, H. Zhang, Y. Yi, H. Y. Woo, H. Ade and J. Hou, *Adv. Mater.*, 2017, **29**, 1700254.
  - 87 Z. Zhang, M. Li, Y. H. Liu, J. C. Zhang, S. Y. Feng, X. J. Xu, J. S. Song and Z. S. Bo, *J. Mater. Chem. A*, 2017, **5**, 7776-7783.
  - 88 Y. Liu, C. e. Zhang, D. Hao, Z. Zhang, L. Wu, M. Li, S. Feng, X. Xu, F. Liu, X. Chen and Z. Bo, *Chem. Mater.*, 2018, **30**, 4307-4312.
  - 89 Q. S. An, F. J. Zhang, X. X. Yin, Q. Q. Sun, M. Zhang, J. Zhang, W. H. Tang and Z. B. Deng, *Nano Energy*, 2016, **30**, 276-282.
  - 90 D. Baran, R. S. Ashraf, D. A. Hanifi, M. Abdelsamie, N. Gasparini, J. A. Rohr, S. Holliday, A. Wadsworth, S. Lockett, M. Neophytou, C. J. Emmott, J. Nelson, C. J. Brabec, A. Amassian, A. Salleo, T. Kirchartz, J. R. Durrant and I. McCulloch, *Nat. Mater.*, 2017, **16**, 363-369.
  - 91 Y. Chen, Y. Qin, Y. Wu, C. Li, H. Yao, N. Liang, X. Wang, W. Li, W. Ma and J. Hou, *Adv. Energy Mater.*, 2017, **7**, 1700328.
  - 92 Y. Chen, P. Ye, Z. G. Zhu, X. Wang, L. Yang, X. Xu, X. Wu, T. Dong, H. Zhang, J. Hou, F. Liu and H. Huang, *Adv. Mater.*, 2017, **29**, 1603154.
  - 93 P. Cheng, M. Zhang, T. K. Lau, Y. Wu, B. Jia, J. Wang, C. Yan, M. Qin, X. Lu and X. Zhan, *Adv. Mater.*, 2017, **29**, 1605216.
  - 94 N. An, Y. Cai, H. Wu, A. Tang, K. Zhang, X. Hao, Z. Ma, Q. Guo, H. S. Ryu, H. Y. Woo, Y. Sun and E. Zhou, *Adv. Mater.*, 2020, **32**, 2002122.
  - 95 Z. Xing, X. C. Meng, R. Sun, T. Hu, Z. Q. Huang, J. Min, X. T. Hu and Y. W. Chen, *Adv. Funct. Mater.*, 2020, **30**, 200417.
  - 96 Q. Guo, J. Lin, H. Q. Liu, X. L. Dong, X. Guo, L. Ye, Z. F. Ma, Z. Tang, H. Ade, M. J. Zhang and Y. F. Li, *Nano Energy*, 2020, **74**, 104861.
  - 97 C. Liu, N. Qiu, Y. Sun, X. Ke, H. Zhang, C. Li, X. Wan and Y. Chen, *Front. Chem.*, 2020, **8**, 329.
  - 98 Z. Q. Zhang, Q. Wu, D. Deng, S. H. Wu, R. Sun, J. Min, J. Q. Zhang and Z. X. Wei, *J. Mater. Chem. C*, 2020, **8**, 15385-15392.
  - 99 H. J. Lai, H. Chen, Y. L. Zhu, L. Chen, H. H. Huang and F. He, *J. Mater. Chem. A*, 2020, **8**, 9670-9676.
  - 100 L. Xiao, M. A. Kolaczkowski, Y. Min and Y. Liu, *ACS Appl. Mater. Interfaces*,

- 2020, **12**, 41852-41860.
- 101 Y. Z. Wang, Z. W. Liu, X. Y. Cui, C. Wang, H. Lu, Y. H. Liu, Z. P. Fei, Z. F. Ma and Z. S. Bo, *J. Mater. Chem. A*, 2020, **8**, 12495-12501.
- 102 X. N. Zhang, N. N. Yao, R. Wang, Y. X. Li, D. Y. Zhang, G. B. Wu, J. Y. Zhou, X. Li, H. Zhang, J. Q. Zhang, Z. X. Wei, C. F. Zhang, H. Q. Zhou, F. L. Zhang and Y. Zhang, *Nano Energy*, 2020, **75**, 105032.
- 103 Y. L. Wang, Y. Wang, L. Zhu, H. Q. Liu, J. Fang, X. Guo, F. Liu, Z. Tang, M. J. Zhang and Y. F. Li, *Energy Environ. Sci.*, 2020, **13**, 1309-1317.
- 104 X. Liu, X. Li, L. Wang, J. Fang and C. Yang, *Nanoscale*, 2020, **12**, 4945-4952.
- 105 Q. Ma, Z. R. Jia, L. Meng, J. Y. Zhang, H. T. Zhang, W. C. Huang, J. Yuan, F. Gao, Y. Wan, Z. J. Zhang and Y. F. Li, *Nano Energy*, 2020, **78**, 105272.
- 106 C. He, Y. Li, Y. Liu, Y. Li, G. Zhou, S. Li, H. Zhu, X. Lu, F. Zhang, C.-Z. Li and H. Chen, *J. Mater. Chem. A*, 2020, **8**, 18154-18161.
- 107 H. T. Yao, L. K. Ma, H. Yu, J. W. Yu, P. C. Y. Chow, W. Y. Xue, X. H. Zou, Y. Z. Chen, J. E. Liang, L. Arunagiri, F. Gao, H. L. Sun, G. Y. Zhang, W. Ma and H. Yan, *Adv. Energy Mater.*, 2020, **10**, 2001408.
- 108 Y. L. Yin, W. X. Zhang, Z. Zheng, Z. Y. Ge, Y. Liu, F. Y. Guo, S. Y. Gao, L. C. Zhao and Y. Zhang, *J. Mater. Chem. C*, 2020, **8**, 12516-12526.
- 109 C. Zhu, J. Yuan, F. F. Cai, L. Meng, H. T. Zhang, H. G. Chen, J. Li, B. B. Qiu, H. J. Peng, S. S. Chen, Y. B. Hu, C. Yang, F. Gao, Y. P. Zou and Y. F. Li, *Energy Environ. Sci.*, 2020, **13**, 2459-2466.
- 110 J. Wan, L. F. Zhang, Q. N. He, S. Q. Liu, B. Huang, L. Hu, W. H. Zhou and Y. W. Chen, *Adv. Funct. Mater.*, 2020, **30**, 1909760.
- 111 Q. S. An, J. W. Wang, X. L. Ma, J. H. Gao, Z. H. Hu, B. Liu, H. L. Sun, X. G. Guo, X. L. Zhang and F. J. Zhang, *Energy Environ. Sci.*, 2020, **13**, 5039-5047.
- 112 M. Privado, P. Malhotra, P. de la Cruz, R. Singhal, J. Cerd, J. Arag, E. Orti, G. D. Sharma and F. Langa, *Sol. RRL*, 2020, **4**, 1900471.
- 113 G. D. Xu, H. Rao, X. F. Liao, Y. D. Zhang, Y. M. Wang, Z. Xing, T. Hu, L. C. Tan, L. Chen and Y. W. Chen, *Chin. J. Chem.*, 2020, **38**, 1553-1559.
- 114 X. Liao, X. Shi, M. Zhang, K. Gao, L. Zuo, F. Liu, Y. Chen and A. K. Jen, *Chem. Commun.*, 2019, **55**, 8258-8261.
- 115 Y. P. Xie, T. F. Li, J. Guo, P. Q. Bi, X. N. Xue, H. S. Ryu, Y. H. Cai, J. Min, L. J. Huo, X. T. Hao, H. Y. Woo, X. W. Zhan and Y. M. Sun, *ACS Energy Lett.*, 2019, **4**, 1196-1203.
- 116 Y. Qin, S. Zhang, Y. Xu, L. Ye, Y. Wu, J. Kong, B. Xu, H. Yao, H. Ade and J. Hou, *Adv. Energy Mater.*, 2019, **9**, 1901823.
- 117 W. Gao, T. Liu, J. W. Li, Y. Q. Xiao, G. Y. Zhang, Y. Z. Chen, C. Zhong, X. H. Lu, H. Yan and C. L. Yang, *J. Mater. Chem. A*, 2019, **7**, 11053-11061.
- 118 K. X. Huang, M. M. Li, M. He, Z. Q. Liang and Y. H. Geng, *Org. Electron.*, 2020, **77**, 105541.
- 119 L. Zhang, W. Deng, B. Wu, L. Ye, X. Sun, Z. Wang, K. Gao, H. Wu, C. Duan, F. Huang and Y. Cao, *ACS Appl. Mater. Interfaces*, 2020, **12**, 753-762.
- 120 L. Hong, H. Yao, R. Yu, Y. Xu, B. Gao, Z. Ge and J. Hou, *ACS Appl. Mater. Interfaces*, 2019, **11**, 29124-29131.

- 121 J. Yuan, T. Huang, P. Cheng, Y. Zou, H. Zhang, J. L. Yang, S. Y. Chang, Z. Zhang, W. Huang, R. Wang, D. Meng, F. Gao and Y. Yang, *Nat. Commun.*, 2019, **10**, 570.
- 122 J. Song, C. Li, L. Zhu, J. Guo, J. Xu, X. Zhang, K. Weng, K. Zhang, J. Min, X. Hao, Y. Zhang, F. Liu and Y. Sun, *Adv. Mater.*, 2019, **31**, 1905645.
- 123 T. Liu, L. J. Huo, X. B. Sun, B. B. Fan, Y. H. Cai, T. Kim, J. Y. Kim, H. Choi and Y. M. Sun, *Adv. Energy Mater.*, 2016, **6**, 1502109.
- 124 T. Liu, X. N. Xue, L. J. Huo, X. B. Sun, Q. S. An, F. J. Zhang, T. P. Russell, F. Liu and Y. M. Sun, *Chem. Mater.*, 2017, **29**, 2914-2920.
- 125 H. Lu, J. Zhang, J. Chen, Q. Liu, X. Gong, S. Feng, X. Xu, W. Ma and Z. Bo, *Adv. Mater.*, 2016, **28**, 9559-9566.
- 126 L. Nian, K. Gao, Y. Jiang, Q. Rong, X. Hu, D. Yuan, F. Liu, X. Peng, T. P. Russell and G. Zhou, *Adv. Mater.*, 2017, **29**, 201700616.
- 127 L. Nian, K. Gao, F. Liu, Y. Kan, X. Jiang, L. Liu, Z. Xie, X. Peng, T. P. Russell and Y. Ma, *Adv. Mater.*, 2016, **28**, 8184-8190.
- 128 B. Xia, L. Yuan, J. Zhang, Z. Wang, J. Fang, Y. Zhao, D. Deng, W. Ma, K. Lu and Z. Wei, *J. Mater. Chem. A*, 2017, **5**, 9859-9866.
- 129 R. Yu, S. Zhang, H. Yao, B. Guo, S. Li, H. Zhang, M. Zhang and J. Hou, *Adv. Mater.*, 2017, **29**, 1700437.
- 130 G. Zhang, K. Zhang, Q. Yin, X. F. Jiang, Z. Wang, J. Xin, W. Ma, H. Yan, F. Huang and Y. Cao, *J. Am. Chem. Soc.*, 2017, **139**, 2387-2395.
- 131 H. Zhang, X. Wang, L. Yang, S. Zhang, Y. Zhang, C. He, W. Ma and J. Hou, *Adv. Mater.*, 2017, **29**, 03777.
- 132 J. Zhang, Y. Zhang, J. Fang, K. Lu, Z. Wang, W. Ma and Z. Wei, *J. Am. Chem. Soc.*, 2015, **137**, 8176-8183.
- 133 M. Zhang, J. Wang, F. Zhang, Y. Mi, Q. S. An, W. B. Wang, X. L. Ma, J. Zhang and X. F. Liu, *Nano Energy*, 2017, **39**, 571-581.
- 134 M. Zhang, F. J. Zhang, Q. S. An, Q. Q. Sun, W. B. Wang, X. L. Ma, J. Zhang and W. H. Tang, *J. Mater. Chem. A*, 2017, **5**, 3589-3598.
- 135 F. W. Zhao, Y. Li, Z. Y. Wang, Y. Yang, Z. Wang, G. Y. He, J. Q. Zhang, L. Jiang, T. S. Wang, Z. X. Wei, W. Ma, B. Li, A. D. Xia, Y. F. Li and C. R. Wang, *Adv. Energy Mater.*, 2017, **7**.
- 136 R. Yu, H. Yao, Y. Cui, L. Hong, C. He and J. Hou, *Adv. Mater.*, 2019, **31**, 1902302.
- 137 C. Sun, F. Pan, S. Chen, R. Wang, R. Sun, Z. Shang, B. Qiu, J. Min, M. Lv, L. Meng, C. Zhang, M. Xiao, C. Yang and Y. Li, *Adv. Mater.*, 2019, **31**, 1905480.
- 138 J. Yuan, Y. Q. Zhang, L. Y. Zhou, G. C. Zhang, H. L. Yip, T. K. Lau, X. H. Lu, C. Zhu, H. J. Peng, P. A. Johnson, M. Leclerc, Y. Cao, J. Ulanski, Y. F. Li and Y. P. Zou, *Joule*, 2019, **3**, 1140-1151.
- 139 H. L. Sun, T. Liu, J. W. Yu, T. K. Lau, G. Y. Zhang, Y. J. Zhang, M. Y. Su, Y. M. Tang, R. J. Ma, B. Liu, J. E. Liang, K. Feng, X. H. Lu, X. G. Guo, F. Gao and H. Yan, *Energy Environ. Sci.*, 2019, **12**, 3328-3337.
- 140 T. Yan, W. Song, J. Huang, R. Peng, L. Huang and Z. Ge, *Adv. Mater.*, 2019, **31**, 1902210.
- 141 H. Yao, Y. Cui, D. Qian, C. S. Ponseca, Jr., A. Honarfar, Y. Xu, J. Xin, Z. Chen,

- L. Hong, B. Gao, R. Yu, Y. Zu, W. Ma, P. Chabera, T. Pullerits, A. Yartsev, F. Gao and J. Hou, *J. Am. Chem. Soc.*, 2019, **141**, 7743-7750.
- 142 T. Liu, W. Gao, Y. L. Wang, T. Yang, R. J. Ma, G. Y. Zhang, C. Zhong, W. Ma, H. Yan and C. L. Yang, *Adv. Funct. Mater.*, 2019, **29**, 1902155.
- 143 T. Liu, Z. H. Luo, Y. Z. Chen, T. Yang, Y. Q. Xiao, G. Y. Zhang, R. J. Ma, X. H. Lu, C. L. Zhan, M. J. Zhang, C. L. Yang, Y. F. Li, J. N. Yao and H. Yan, *Energy Environ. Sci.*, 2019, **12**, 2529-2536.
- 144 Y. Gao, Z. Wang, J. Zhang, H. Zhang, K. Lu, F. Guo, Y. Yang, L. Zhao, Z. Wei and Y. Zhang, *J. Mater. Chem. A*, 2018, **6**, 4023-4031.
- 145 Y. He, T. Heumüller, W. Lai, G. Feng, A. Classen, X. Du, C. Liu, W. Li, N. Li and C. J. Brabec, *Adv. Energy Mater.*, 2019, **9**, 1900409.
- 146 X. S. Li, K. K. Weng, H. S. Ryu, J. Guo, X. N. Zhang, T. Xia, H. T. Fu, D. H. Wei, J. Min, Y. Zhang, H. Y. Woo and Y. M. Sun, *Adv. Funct. Mater.*, 2020, **30**, 1906809.
- 147 R. Roesch, K. R. Eberhardt, S. Engmann, G. Gobsch and H. Hoppe, *Sol. Energ. Mat. Sol. C*, 2013, **117**, 59-66.
- 148 F. Yang, W. Zhao, Q. Zhu, C. Li, W. Ma, J. Hou and W. Li, *Macromolecules*, 2019, **52**, 2214-2221.
- 149 J. Guo, Y. Wu, R. Sun, W. Wang, J. Guo, Q. Wu, X. Tang, C. Sun, Z. Luo, K. Chang, Z. Zhang, J. Yuan, T. Li, W. Tang, E. Zhou, Z. Xiao, L. Ding, Y. Zou, X. Zhan, C. Yang, Z. Li, C. J. Brabec, Y. Li and J. Min, *J. Mater. Chem. A*, 2019, **7**, 25088-25101.
